# Supplementary material
Source: PubMed Central journal article supplement (PMC7781460)
Supplement: djaa046_supplementary_data.pdf [file djaa046_supplementary_data.pdf]

Supplementary Table 1. Sensitivity landmark analysis representing the associations of regular recreational physical activity during and after treatment with mortality in the DELCaP study

| RPA Exposure Window Assessed* | Parameterization of Recreational Physical Activity <sup>§</sup> |                                                                            | All-cause Mortality         |                         |                      |
|-------------------------------|-----------------------------------------------------------------|----------------------------------------------------------------------------|-----------------------------|-------------------------|----------------------|
|                               |                                                                 |                                                                            | HR <sup>¶</sup>             | 95% Confidence Interval |                      |
|                               |                                                                 |                                                                            |                             | CI lower                | CI upper             |
| Q2                            | Any regular, weekly RPA                                         | No<br>Yes                                                                  | Ref<br>0.64                 | 0.47                    | 0.86                 |
|                               | Meet the minimum PAGAs                                          | No<br>Yes                                                                  | Ref<br>0.56                 | 0.39                    | 0.80                 |
|                               | Incremental activity categories (PAGAs)                         | No weekly RPA<br>Low weekly activity<br>Moderate activity<br>High activity | Ref<br>0.83<br>0.49<br>0.57 | 0.55<br>0.27<br>0.36    | 1.25<br>0.87<br>0.88 |
| Q3                            | Any regular, weekly RPA                                         | No<br>Yes                                                                  | Ref<br>0.56                 | 0.39                    | 0.81                 |
|                               | Meet the minimum PAGAs                                          | No<br>Yes                                                                  | Ref<br>0.64                 | 0.43                    | 0.96                 |
|                               | Incremental activity categories (PAGAs)                         | No weekly RPA<br>Low weekly activity<br>Moderate activity<br>High activity | Ref<br>0.53<br>0.58<br>0.58 | 0.29<br>0.30<br>0.36    | 0.96<br>1.11<br>0.95 |
| Q4                            | Any regular, weekly RPA                                         | No<br>Yes                                                                  | Ref<br>0.61                 | 0.37                    | 1.02                 |
|                               | Meet the minimum PAGAs                                          | No<br>Yes                                                                  | Ref<br>0.60                 | 0.31                    | 1.12                 |
|                               | Incremental activity categories (PAGAs)                         | No weekly RPA<br>Low weekly activity<br>Moderate activity<br>High activity | Ref<br>0.69<br>0.57<br>0.57 | 0.33<br>0.20<br>0.26    | 1.47<br>1.57<br>1.26 |

\*Q2 was administered at treatment completion and represents RPA performed during chemotherapy; Q3 was administered one year after study enrollment and assessed RPA performed in previous 12 months; Q4 was administered two years after study enrollment and assessed RPA performed in previous 12 months

<sup>§</sup>METs are expressed as average MET hours per week; Any regular, weekly RPA (yes/no) denotes at least one session per week throughout the exposure window assessed; Meeting the minimum PAGAs (yes/no) uses <8.3 MET hours per week as the cut-off for no; ≥8.3 for yes.

<sup>¶</sup>Multivariable hazard models are adjusted for age and stratified by treatment arm
